# Supplementary material
Source: publisher figshare collection journal article supplement (https://gsajournals.figshare.com/ndownloader/files/15583595)
Supplement: Supplementary file 1 [file 15583595]

## Sheet: Table 1
Table S1. Mean survival by line for adult males and females exposed to 6 h or anoxia, and mean survival for larvae exposed to 1 h of anoxia.
	Female				Adult Male				Larvae
Line no.	N	Mean	SE	Variance	N	Mean	SE	Variance	N	Mean	SE	Variance
21	4	0.724	0.08	0.025	3	0.077	0.077	0.018	-	-	-	-
26	4	0.803	0.165	0.109	3	0.184	0.159	0.075	3	0.831	0.058	0.01
28	-	-	-	-	-	-	-	-	3	0.783	0.067	0.013
31	4	0.226	0.178	0.127	4	0.188	0.188	0.141	3	0.65	0.104	0.032
32	3	0.079	0.079	0.019	3	0.022	0.022	0.001	3	0.792	0.094	0.026
38	-	-	-	-	-	-	-	-	2	0.75	0	0
40	3	0.228	0.092	0.026	3	0.224	0.062	0.012	3	0.652	0.075	0.017
42	4	0.049	0.036	0.005	4	0.022	0.022	0.002	2	0.675	0.175	0.061
45	3	0.1	0.1	0.03	4	0.096	0.096	0.037	3	0.85	0.076	0.018
48	4	0.508	0.13	0.068	3	0.178	0.097	0.028	3	0.733	0.12	0.043
57	4	0.453	0.153	0.094	4	0.019	0.019	0.001	2	0.825	0.075	0.011
59	3	0.183	0.074	0.016	3	0.088	0.027	0.002	3	0.783	0.083	0.021
69	3	0.022	0.022	0.001	3	0	0	0	-	-	-	-
73	4	0.174	0.07	0.019	4	0.034	0.021	0.002	3	0.683	0.12	0.043
75	3	0	0	0	4	0.05	0.05	0.01	3	0.533	0.117	0.041
83	-	-	-	-	-	-	-	-	3	0.776	0.081	0.019
85	4	0	0	0	3	0	0	0	2	0.75	0.05	0.005
88	-	-	-	-	-	-	-	-	3	0.628	0.036	0.004
91	3	0.529	0.243	0.177	3	0.222	0.222	0.148	3	0.867	0.073	0.016
93	-	-		-	-	-	-	-	3	0.494	0.14	0.059
100	3	0	0	0	3	0	0	0	3	0.739	0.039	0.005
101	3	0.056	0.056	0.009	3	0.131	0.072	0.016	2	0.775	0.075	0.011
105	3	0	0	0	4	0	0	0	3	0.825	0.043	0.006
109	4	0.038	0.013	0.001	4	0.023	0.013	0.001	-	-	-	-
129	-	-	-	-	-	-	-	-	2	0.925	0.025	0.001
136	3	0.556	0.179	0.097	3	0.357	0.221	0.147	3	0.88	0.015	0.001
138	3	0.102	0.055	0.009	3	0.027	0.027	0.002	3	0.746	0.033	0.003
142	4	0.063	0.034	0.005	4	0	0	0	3	0.739	0.081	0.02
149	3	0.141	0.069	0.014	3	0.062	0.038	0.004	3	0.39	0.104	0.033
153	4	1	0	0	3	0.756	0.177	0.094	4	0.838	0.012	0.001
158	4	0.711	0.221	0.196	3	0.619	0.312	0.293	3	0.872	0.055	0.009
161	-	-	-	-	-	-	-	-	-	-	-	-
176	4	0.178	0.041	0.007	4	0.053	0.037	0.006	3	0.512	0.177	0.094
177	4	0	0	0	4	0.012	0.012	0.001	3	0.794	0.072	0.016
181	3	0.069	0.05	0.008	3	0	0	0	3	0.739	0.006	0
189	4	0.134	0.033	0.004	4	0.046	0.029	0.003	2	0.933	0	0
195	4	0.053	0.021	0.002	4	0.04	0.026	0.003	3	0.567	0.069	0.014
208	3	0.612	0.128	0.049	3	0.283	0.109	0.036	-	-	-	-
217	3	0.917	0.083	0.021	3	0.417	0.267	0.213	3	0.828	0.055	0.009
227	4	0.185	0.06	0.014	4	0.141	0.065	0.017	3	0.533	0.192	0.111
228	4	0.033	0.033	0.004	3	0.024	0.024	0.002	3	0.463	0.135	0.055
233	-	-	-	-	-	-	-	-	2	0.2	0	0
235	4	0.511	0.102	0.042	4	0.141	0.089	0.032	-	-	-	-
237	-	-	-	-	-	-	-	-	3	0.339	0.077	0.018
239	4	0.05	0.029	0.003	4	0	0	0	3	0.783	0.079	0.019
256	4	0.029	0.017	0.001	4	0.038	0.038	0.006	-	-	-	-
280	4	0.013	0.013	0.001	4	0.068	0.044	0.008	4	0.862	0.052	0.011
287	4	0	0	0	4	0	0	0	3	0.55	0.115	0.04
301	4	0.036	0.036	0.005	4	0.012	0/.012	0.001	3	0.794	0.047	0.007
303	-	-	-	-	-	-	-	-	3	0.867	0.083	0.021
304	4	0.035	0.022	0.002	4	0.141	0/.072	0.021	4	0.7	0.071	0.02
306	4	0.362	0.145	0.084	4	0.578	0/.205	0.169	3	0.717	0.044	0.006
307	4	0.137	0.032	0.004	4	0.112	0/.069	0.019	3	0.467	0.067	0.013
309	4	0.051	0.02	0.002	4	0	0	0	4	0.812	0.043	0.007
310	4	0.072	0.025	0.003	4	0.018	0.018	0.001	3	0.883	0.117	0.041
313	4	0.195	0.075	0.023	4	0.051	0.02	0.002	4	0.762	0.055	0.012
315	4	0.067	0.054	0.012	4	0.05	0.038	0.006	4	0.75	0.065	0.017
317	4	0.044	0.03	0.003	4	0	0	0	3	0.75	0.029	0.002
318	4	0.382	0.161	0.104	4	0.031	0.031	0.004	3	0.6	0.076	0.018
319	4	0.062	0.062	0.016	4	0.019	0.019	0.001	3	0.633	0.109	0.036
320	4	0.065	0.016	0.001	4	0.012	0.012	0.001	3	0.567	0.093	0.026
321	3	0.893	0.054	0.009	4	0.528	0.137	0.075	2	0.782	0.018	0.001
324	3	0.837	0.089	0.024	3	0.802	0.125	0.047	4	0.767	0.039	0.006
332	3	0.413	0.125	0.047	3	0.186	0.116	0.041	-	-	-	-
335	-	-	-	-	-	-	-	-	3	0.739	0.039	0.005
336	-	-	-	-	-	-	-	-	2	0.65	0.05	0.005
338	4	0.312	0.105	0.044	3	0.409	0.228	0.156	4	0.671	0.089	0.032
340	4	0.082	0.037	0.006	4	0	0	0	3	0.883	0.044	0.006
348	4	0.04	0.024	0.002	4	0.05	0.032	0.004	4	0.812	0.085	0.029
350	4	0.055	0.036	0.005	4	0	0	0	4	0.66	0.138	0.076
352	4	0.712	0.195	0.152	4	0.638	0.212	0.181	4	0.774	0.076	0.023
354	4	0.188	0.012	0.001	4	0.036	0.012	0.001	-	-	-	-
356	-	-	-	-	-	-	-	-	3	0.75	0.076	0.018
357	4	0.182	0.068	0.019	4	0.129	0.059	0.014	4	0.762	0.08	0.026
358	4	0.094	0.094	0.035	3	0	0	0	3	0.4	0.1	0.03
359	4	0.399	0.236	0.223	3	0.317	0.317	0.301	4	0.686	0.112	0.05
360	4	0.096	0.041	0.007	3	0.044	0.003	0	3	0.867	0.038	0.004
361	4	0.062	0.04	0.006	4	0	0	0	3	0.833	0.017	0.001
362	4	0.08	0.08	0.026	4	0.071	0.025	0.003	2	0.758	0.158	0.05
365	4	0.139	0.034	0.005	4	0.148	0.017	0.001	3	0.836	0.102	0.031
367	4	0.1	0.079	0.025	4	0	0	0	3	0.676	0.091	0.025
370	4	0.888	0.112	0.051	3	0.667	0.333	0.333	3	0.889	0.059	0.01
371	4	0.214	0.214	0.184	4	0.143	0.143	0.082	3	0.883	0.033	0.003
373	3 3	0.983	0.017	0.001 0.052	4 -	0.326	0.115	0.053 -	3 3	0.722	0.04	0.005 0.07
375	-	-	-	-	-	-	-	-	3	0.8	0.153	0.07
377	4	1	0	0	4	0.981	0.019	0.001	3	0.65	0.076	0.018
379	4	0.343	0.221	0.196	4	0.279	0.242	0.234	3	0.7	0.029	0.002
380	4	0.488	0.255	0.261	3	0.55	0.275	0.228	4	0.478	0.097	0.038
381	4	0.359	0.22	0.193	4	0.076	0.035	0.005	-	-	-	-
382	3	0.171	0.097	0.028	4	0.084	0.059	0.014	-	-	-	-
383	3	0.333	0.067	0.013	4	0.144	0.059	0.014	3	0.806	0.071	0.015
385	4	0.172	0.094	0.035	3	0.069	0.069	0.014	3	0.833	0.033	0.003
386	3	0.048	0.048	0.007	3	0.151	0.125	0.047	3	0.85	0.029	0.002
387	-	-	-	-	-	-	-	-	-	-	-	-
390	-	-	-	-	-	-	-	-	3	0.733	0.169	0.086
391	4	0.015	0.015	0.001	4	0.05	0.035	0.005	3	0.733	0.073	0.016
392	4	0.964	0.036	0.005	4	0.849	0.092	0.034	3	0.896	0.023	0.002
395	4	0.271	0.107	0.046	3	0.033	0.033	0.003	3	0.917	0.043	0.005
397	3	0.133	0.133	0.053	3	0.037	0.037	0.004	3	0.65	0.104	0.032
399	3	0.056	0.056	0.009	3	0	0	0	3	0.833	0.033	0.003
405	4	0.278	0.208	0.173	4	0.282	0.077	0.024	3	0.817	0.044	0.006
409	4	0.224	0.211	0.178	4	0.01	0.01	0	3	0.685	0.01	0
426	4	0.095	0.017	0.001	4	0.068	0.024	0.002	-	-	-	-
427	4	0.116	0.068	0.018	4	0.013	0.013	0.001	3	0.914	0.048	0.007
437	4	0.176	0.154	0.095	4	0.295	0.172	0.118	3	0.667	0.133	0.053
439	4	0.196	0.053	0.011	4	0.061	0.035	0.005	4	0.672	0.094	0.035
440	3	0.875	0.067	0.014	3	0.65	0.223	0.149	3	0.883	0.073	0.016
441	3	0.306	0.106	0.034	4	0.109	0.069	0.019	3	0.776	0.174	0.091
443	4	0.862	0.055	0.012	4	0.904	0.063	0.016	3	0.7	0.076	0.018
461	-	-	-	-	-	-	-	-	3	0.772	0.122	0.045
486	4	0.054	0.054	0.011	4	0.026	0.026	0.003	3	0.622	0.08	0.019
491	4	0.329	0.125	0.062	4	0.083	0.028	0.003	3	0.65	0.058	0.01
492	4	0.181	0.082	0.027	4	0.136	0.085	0.029	-	-	-	-
502	4	0.095	0.036	0.005	4	0.111	0.028	0.003	3	0.867	0.038	0.004
505	-	-	-	-	-	-	-	-	3	0.933	0.033	0.003
508	4	0.116	0.096	0.037	4	0.121	0.094	0.035	3	0.867	0.033	0.003
509	4	0.083	0.037	0.006	4	0.121	0.043	0.007	-	-	-	-
513	4	0.035	0.02	0.002	4	0	0	0	3	0.767	0.088	0.023
517	4	0.181	0.108	0.046	4	0.155	0.116	0.054	2	0.7	0.05	0.005
528	4	0.016	0.016	0.001	4	0	0	0	-	-	-	-
530	4	0.038	0.038	0.006	4	0.027	0.016	0.001	3	0.983	0.017	0.001
531	4	0	0	0	4	0	0	0	2	0.45	0.05	0.005
535	-	-	-	-	-	-	-	-	4	0.753	0.055	0.012
551	4	0.03	0.03	0.004	4	0	0	0	2	0.825	0.075	0.011
555	4	0.029	0.029	0.003	4	0.017	0/.017	0.001	3	0.867	0.033	0.003
559	4	0.392	0.209	0.174	4	0.213	0/.154	0.094	4	0.781	0.062	0.016
563	4	0.95	0.05	0.01	4	0.84	0.095	0.036	3	0.7	0.115	0.04
566	4	0.037	0.022	0.002	4	0.079	0.036	0.005	4	0.723	0.016	0.001
584	4	0.176	0.086	0.03	4	0.238	0.09	0.033	4	0.911	0.018	0.001
589	4	0.874	0.109	0.047	4	0.539	0.128	0.066	2	0.859	0.041	0.003
595	4	0.095	0.047	0.009	4	0.112	0.048	0.009	4	0.862	0.043	0.007
596	4	0.06	0.023	0.002	4	0.015	0.015	0.001	-	-	-	-
627	4	0.016	0.016	0.001	4	0	0	0	3	0.889	0.022	0.001
630	4	0.04	0.026	0.003	4	0.114	0.035	0.005	4	0.635	0.088	0.031
634	4	0.352	0.13	0.067	4	0.263	0.13	0.068	4	0.45	0.092	0.034
639	6	0.538	0.083	0.042	6	0.118	0.044	0.012	4	0.8	0.05	0.01
646	4	0.126	0.062	0.015	4	0.024	0.024	0.002	2	0.2	0	0
703	4	0.065	0.036	0.005	4	0.049	0.028	0.003	4	0.538	0.134	0.072
705	3	0.584	0.244	0.178	3	0.597	0.202	0.122	3	0.833	0.06	0.011
707	3	0.759	0.021	0.001	4	0.571	0.182	0.133	3	0.967	0.017	0.001
712	4	0.01	0.01	0	4	0	0	0	3	0.667	0.067	0.013
714	3	0.169	0.101	0.03	4	0.068	0.025	0.003	-	-	-	-
716	3	0.452	0.293	0.257	4	0.315	0.156	0.097	3	0.8	0.115	0.04
721	3	0.171	0.079	0.019	3	0.013	0.013	0.001	3	0.756	0.022	0.001
727	4	0.098	0.064	0.016	4	0.029	0.017	0.001	-	-	-	-
730	3	1	0	0	3	0.801	0.1	0.03	3	0.933	0.044	0.006
732	4	0.218	0.143	0.081	4	0.45	0.263	0.277	3	0.9	0.076	0.018
737	4	0.42	0.116	0.053	4	0.256	0.202	0.164	3	0.683	0.136	0.056
738	5	0.32	0.173	0.149	6	0.252	0.138	0.114	3	0.75	0.132	0.052
748	4	0.372	0.218	0.19	4	0.683	0.23	0.212	3	0.733	0.073	0.016
757	3	0.026	0.026	0.002	4	0.041	0.026	0.003	-	-	-	-
761	4	0.033	0.033	0.004	4	0	0	0	3	0.567	0.06	0.011
765	4	0.152	0.09	0.033	4	0.062	0.024	0.002	2	0.859	0.041	0.003
774	4	0.293	0.237	0.225	4	0.249	0.223	0.199	3	0.667	0.038	0.004
776	3	0.95	0.029	0.002	4	0.575	0.217	0.189	3	0.922	0.04	0.005
783	4	0.4	0.232	0.215	4	0.578	0.196	0.154	2	0.855	0.055	0.006
786	4	0.739	0.218	0.191	4	0.481	0.205	0.168	4	0.763	0.048	0.009
787	4	0.312	0.164	0.107	4	0.241	0.159	0.101	3	0.617	0.044	0.006
790	3	0.893	0.034	0.003	3	0.571	0.297	0.265	2	0.889	0.111	0.025
796	4	0.321	0.112	0.05	4	0.189	0.109	0.047	3	0.272	0.106	0.034
799	-	-	-	-	-	-	-	-	3	0.436	0.108	0.035
801	-	-	-	-	-	-	-	-	4	0.515	0.062	0.015
802	4	0.129	0.105	0.044	4	0.267	0.096	0.037	3	0.644	0.044	0.006
804	4	0.015	0.015	0.001	4	0	0	0	3	0.567	0.088	0.023
805	4	0.84	0.068	0.019	4	0.294	0.031	0.004	3	0.467	0.102	0.031
808	4	0.083	0.032	0.004	4	0.191	0.052	0.011	3	0.633	0.088	0.023
810	4	0.57	0.209	0.175	3	0.053	0.053	0.009	3	0.772	0.086	0.022
812	4	0.147	0.034	0.005	4	0.025	0.025	0.002	-	-	-	-
818	4	0.061	0.047	0.009	4	0.039	0.026	0.003	3	0.289	0.111	0.037
819	4	0.197	0.074	0.022	4	0	0	0	-	-	-	-
820	4	0.381	0.11	0.048	4	0.011	0.011	0.001	3	0.917	0.044	0.006
821	4	0.468	0.196	0.153	3	0.345	0.106	0.034	3	0.533	0.067	0.013
822	4	0.381	0.231	0.214	4	0.406	0.239	0.228	4	0.575	0.014	0.001
832	-	-	-	-	-	-	-	-	3	0.833	0.033	0.003
843	4	0.201	0.172	0.119	4	0.25	0.25	0.25	3	0.822	0.022	0.001
849	4	0.096	0.034	0.005	4	0.106	0.054	0.012	-	-	-	-
850	4	0.255	0.131	0.069	4	0	0	0	3	0.617	0.109	0.036
852	5	0.308	0.173	0.15	4	0.253	0.217	0.189	3	0.924	0.014	0.001
853	4	0.167	0.06	0.014	4	0	0	0	3	0.617	0.142	0.061
855	3	0.605	0.055	0.009	3	0.142	0.118	0.041	3	0.933	0.044	0.006
857	3	0.979	0.021	0.001	3	0.93	0.035	0.004	3	0.744	0.082	0.02
859	6	0.152	0.127	0.097	3	0	0	0	3	0.833	0.093	0.026
861	-	-	-	-	-	-	-	-	2	0.8	0.15	0.045
879	4	0.25	0.25	0.25	4	0.145	0.095	0.036	-	-	-	-
882	3	0.941	0.03	0.003	4	0.804	0.152	0.093	2	0.892	0.058	0.007
884	4	0.214	0.038	0.006	4	0.167	0.047	0.009	3	0.967	0.017	0.001
890	4	0.133	0.047	0.009	4	0.014	0.014	0.001	3	0.75	0.05	0.008
892	4	0.245	0.102	0.041	4	0.114	0.049	0.01	-	-	-	-
894	4	0.019	0.019	0.001	4	0.025	0.025	0.002	-	-	-	-
897	4	0.267	0.141	0.079	4	0.071	0.057	0.013	3	0.95	0	0
900	4	0.057	0.043	0.007	4	0.029	0.029	0.003	3	0.711	0.156	0.073
907	4	0.361	0.142	0.081	4	0.105	0.06	0.015	3	0.8	0.029	0.002
908	4	0.734	0.218	0.19	4	0.672	0.16	0.103	3	0.752	0.148	0.066
911	-	-	-	-	-	-	-	-	3	0.667	0.044	0.006
913	3	0.152	0.152	0.069	4	0.015	0.015	0.001	3	0.883	0.044	0.006
